# Supplementary material for: ASC proneural transcription factors mediate the timely initiation of the neural program during neuroectodermal to neuroblast transition ensuring progeny fidelity
Source: bioRxiv or medRxiv preprint supplement (doi:10.1101/2021.11.02.466869), 2021-11-03
Supplement: Supplementary file [file media-1.pdf]

1 **Supplemental Figures and legends (Fig. S1-S8)**

Supplemental Figure S1

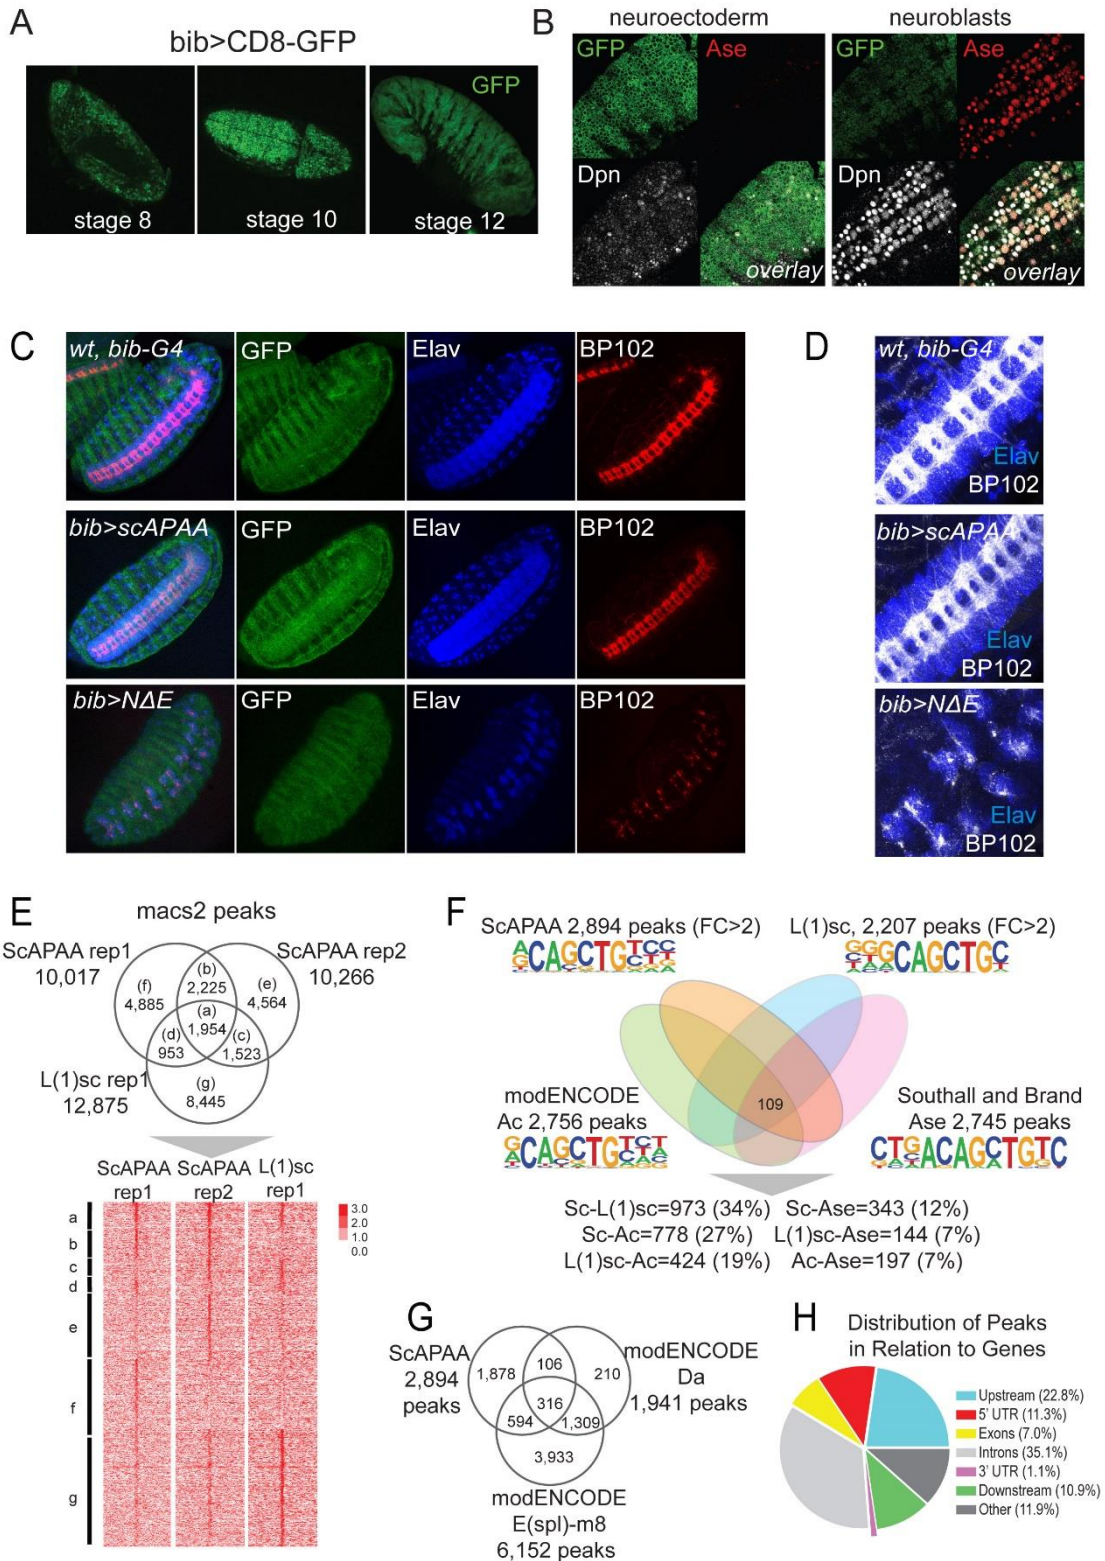

2

3 **Fig. S1. Phenotypes of *bib*-Gal4 driven expression of U-*scAPAA* and U-*NΔE* and genomic**  
 4 **analyses of proneural binding consensus. A)** Stage 8, 10 and 12 embryos of *bib*-GAL4 x U-  
 5 CD8-GFP show neuroectodermal expression, which expands laterally at late stages (st 12). B)  
 6 Stage 10 neuroblasts in *bib*-GAL4 x U-CD8-GFP express residual GFP. Single sections, using

7 the same laser settings, for the neuroectoderm and neuroblast focal planes of the same embryo.  
8 C) Stage 16 embryos showing mild nerve cord hyperplasia in U-scAPAA and severe  
9 hypoplastic phenotype in U-NΔE;Elav marks neuronal nuclei; BP102 marks axons. D)  
10 Neuromeres of stage 16 embryos of U-NΔE embryos exhibit clumps of neurons with limited  
11 axonogenesis compared to wt or U-scAPAA. E) Peak overlaps among the 3 replicates of  
12 ScAPAA and L(1)sc CHIP experiments. Heatmap below the venn diagram shows the  
13 corresponding normalized over input signals of read density. F) Overlap at the level of peaks  
14 between all 4 ASC family members and the percentages of pairwise comparisons – percentages  
15 state the overlap of binding events for the first factor with respect to the second. De novo motif  
16 analysis (homer) revealed slight changes in the enriched E-box bHLH motif. G) Venn diagram  
17 of binding peaks overlaps among the proneural ScAPAA consensus and Da and E(spl)m8 from  
18 modENCODE data. H) Genomic distribution of the 2,984 proneural binding consensus (Pavis).

19

20

21

## Supplemental Figure S2

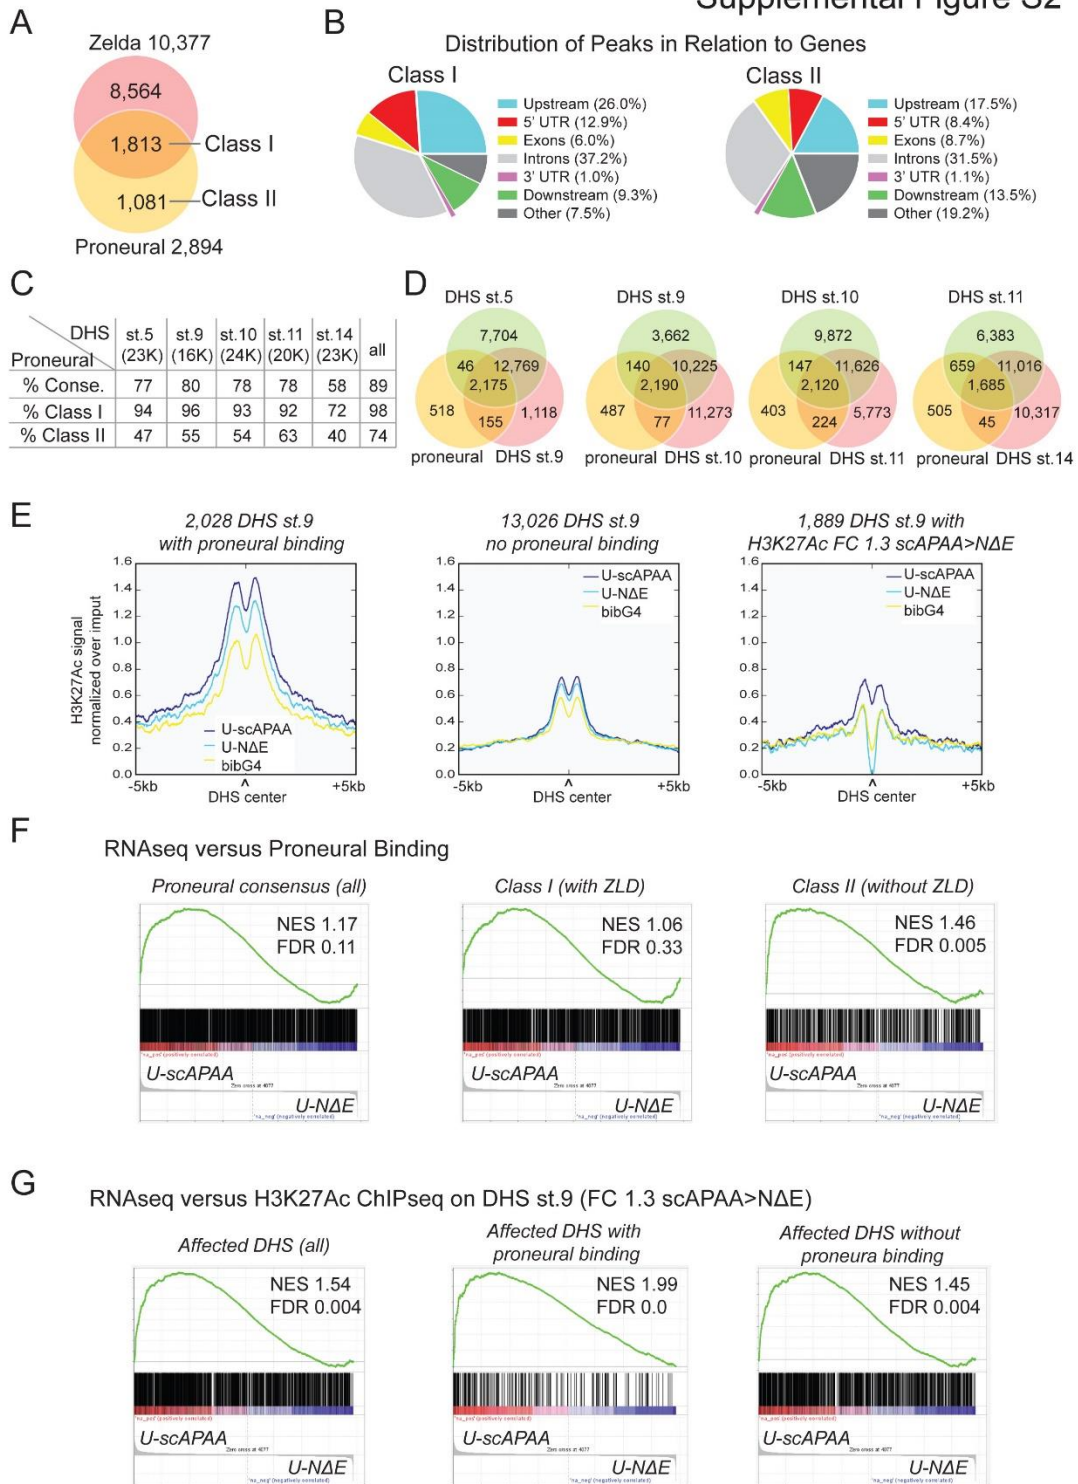

22

23 **Fig. S2. Proneural regulated chromatin effects correlate with transcriptional output**

24 A) Overlap of proneural consensus peaks during neuroblast specification with Zelda binding  
25 events during MZT. Two classes of events are shown, Class I bound by Zelda and class II  
26 Zelda independent. B) Genomic distribution of class I and II proneural binding sites (Pavis).  
27 C) Percentage of proneural binding peaks overlapping with stage specific DHS sites from  
28 Thomas et al (2011), The top row refers to all 2,894 peaks; the next two rows present Class I  
29 and Class II peaks separately. D) Venn diagrams of proneural peaks with consecutive stage

30 specific DHS sites. E) Averaged, normalized signal of the H3K27Ac ChIPseq from U-  
31 scAPAA, U-NΔE and wt, bibG4 embryos in stage 9 DHSs: 2,028 with proneural binding  
32 (left), 13,026 without proneural binding (middle) and in 1,889 DHS loci that exhibited FC 1.3  
33 in U-scAPAA>U-NDE. F) Gene set enrichment analysis (GSEA) plots of the RNAseq ranked  
34 genes in U-scAPAA vs. U-NΔE with all Proneural binding events (left), class I (middle) and  
35 class II (right). G) GSEA plots of the RNAseq ranked genes in U-scAPAA vs. U-NΔE with  
36 stage 9 DHS sites affected in H3K27Ac by FC>1.3 in U-scAPAA>U-NDE, all (left), 306  
37 that are also proneural bound (middle) and 1,583 affected DHS sites but not bound (right).

38

39

40

41

42

43

44



Supplemental Figure S3

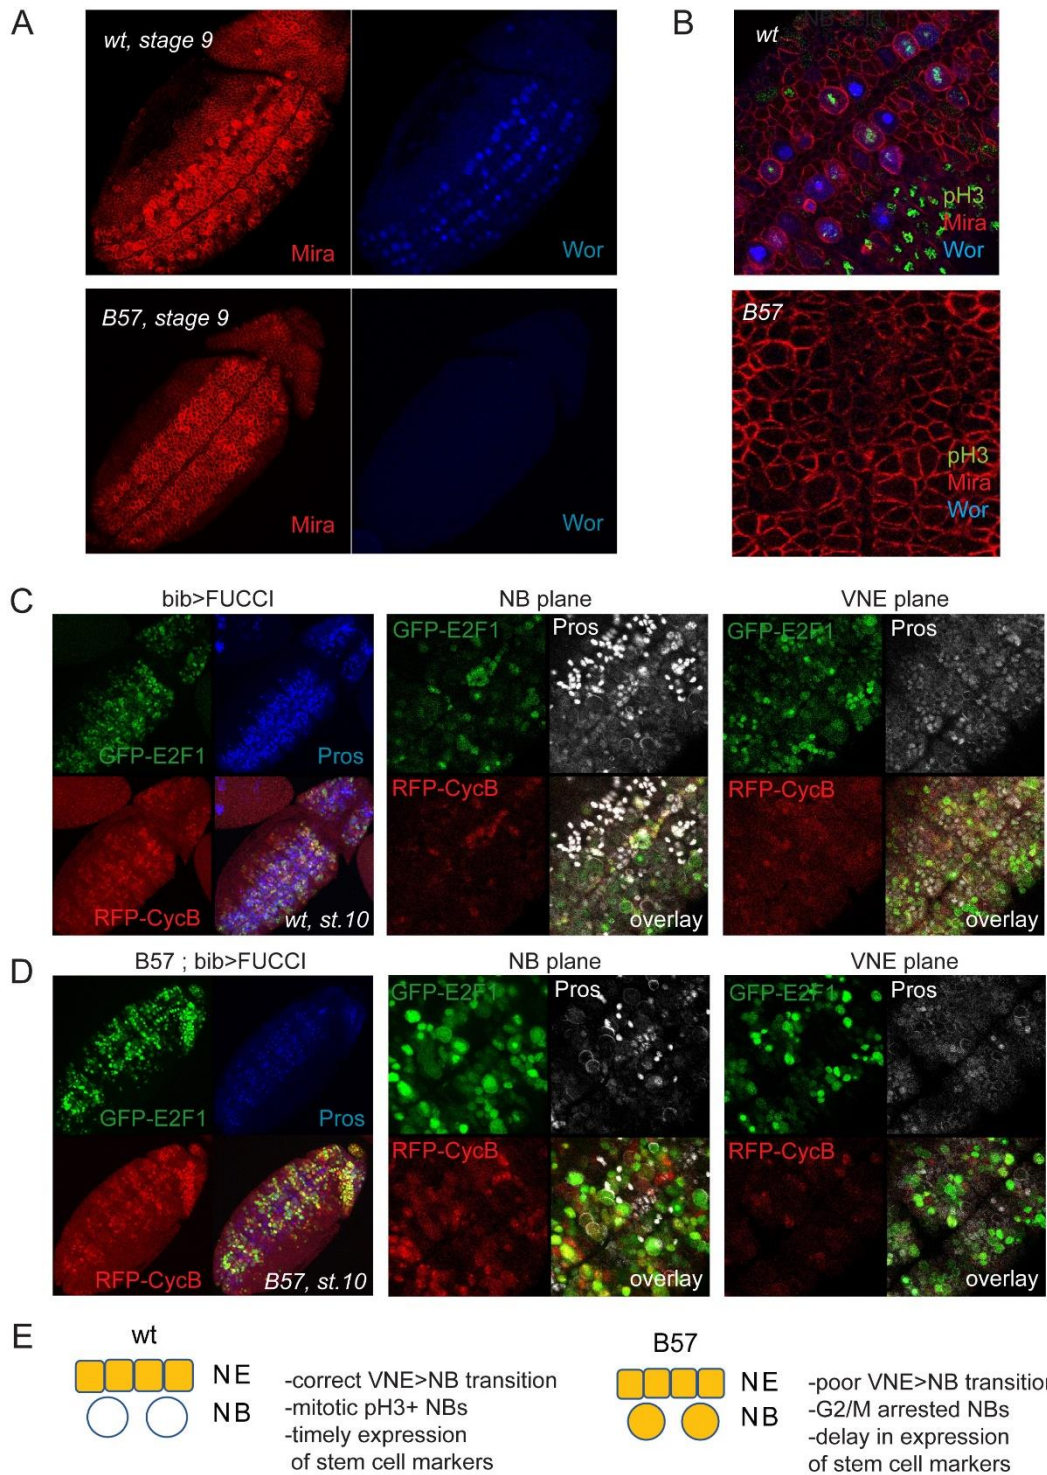

45

46 **Fig. S3. ASC mutant neuroblasts are initially arrested at G2/M.**

47 Stage 9 S1 wt neuroblasts express Worniu robustly, whereas mutants do not. Mira stains the  
 48 entire ventral NE. B) Single sections at the neuroblast level below the embryo surface shows  
 49 that S1 delaminated neuroblasts of Df(1)scB7 embryos do not express Worniu nor do they  
 50 proliferate (pH3), unlike wt neuroblasts. C) bibGal4 wt stage 10 embryo expressing a dual  
 51 UAS-GFP-E2F1;UAS-RFP-CycB (FUCCI). Left panel shows a projection of a ventral view  
 52 of the entire embryo, where GFP and RFP are expressed in the neuroectoderm in response to  
 53 bibGal4. At the NB level (middle panel) limited GFP/RFP expression is detected. Right panel

54 shows strong signal of GFP (G1 marker) at the overlying ventral neuroectoderm level. D) In  
55 Df(1)scB7 stage 10 embryo (left) which is just rebounding (few Pros+ GMCs present), many  
56 delaminated neuroblasts (middle) that have not divided yet co-express both GFP and RFP  
57 suggesting a G2/M arrest, whereas the VNE plane (right) is comparable to wt. E) A model  
58 cartoon summarizing the phenotype of the delaminated cells in the deletion of ASC proneural  
59 genes.

60

61

62

63

64

## Supplemental Figure S4

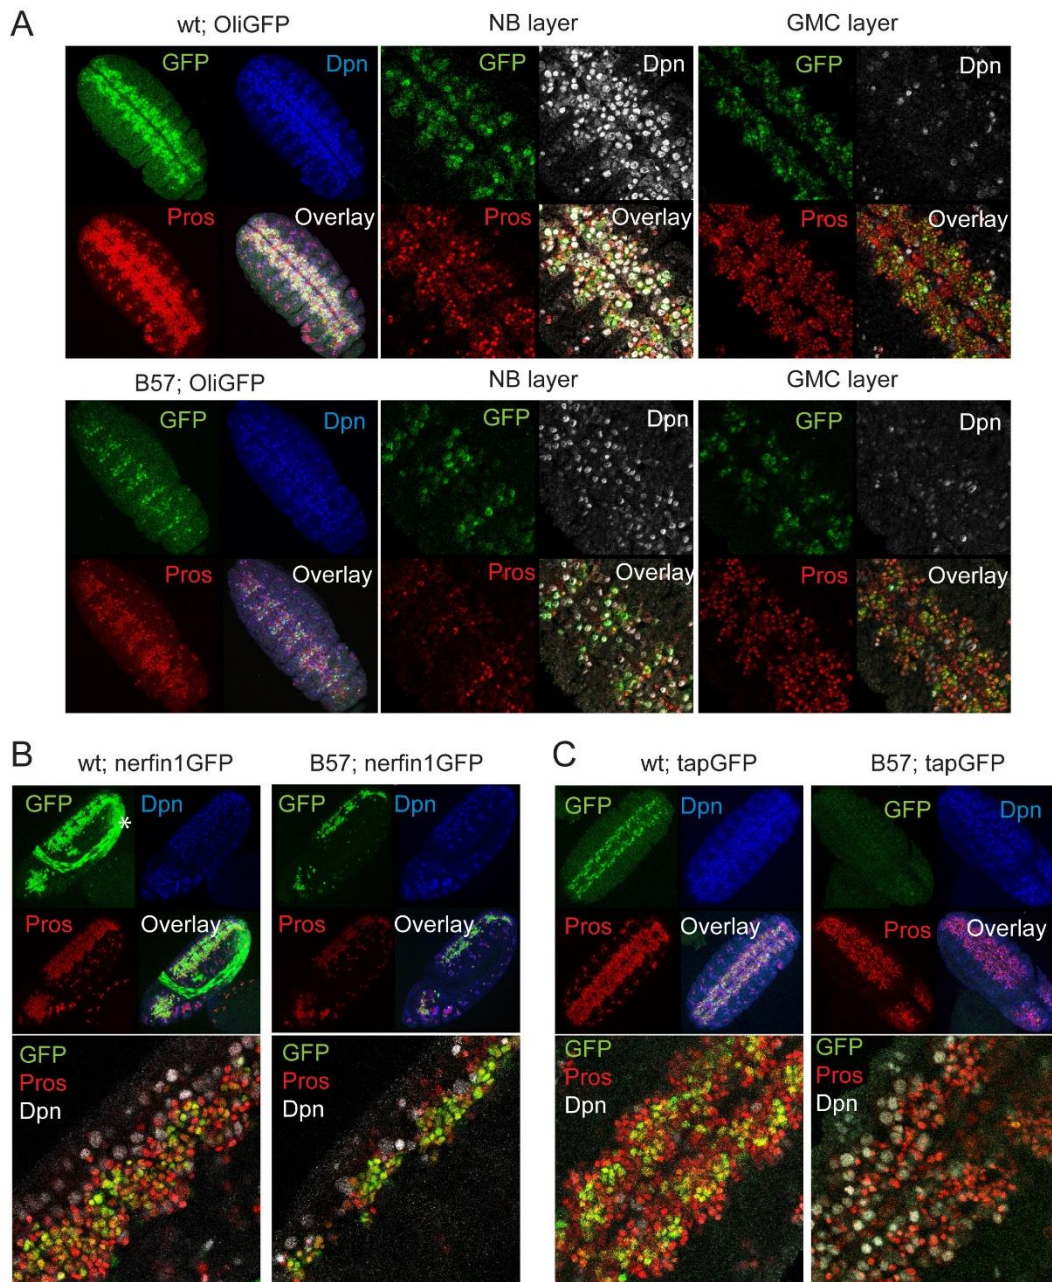

65

66 **Fig. S4. GMC expression of proneural targets is also impaired in ASC mutants**  
 67 A) OliGFP exhibits neuroblast and GMC expression in wt embryos. In Dfsc(1)B57 after the  
 68 stalling window OliGFP expression is restricted. B) nerfin1GFP is predominantly expressed in  
 69 the GMC pool and shows restricted expression in Dfsc(1)B57 embryos. The GFP in the  
 70 amnioserosa (marked with \*) is coming from the FM7, KrGAL4,UASGFP chromosome used  
 71 to distinguish wt from mutant embryos. C) tapGFP is normally expressed in many GMCs and  
 72 in Dfsc(1)B57 embryos its expression is not observed during stage 11.

73

74



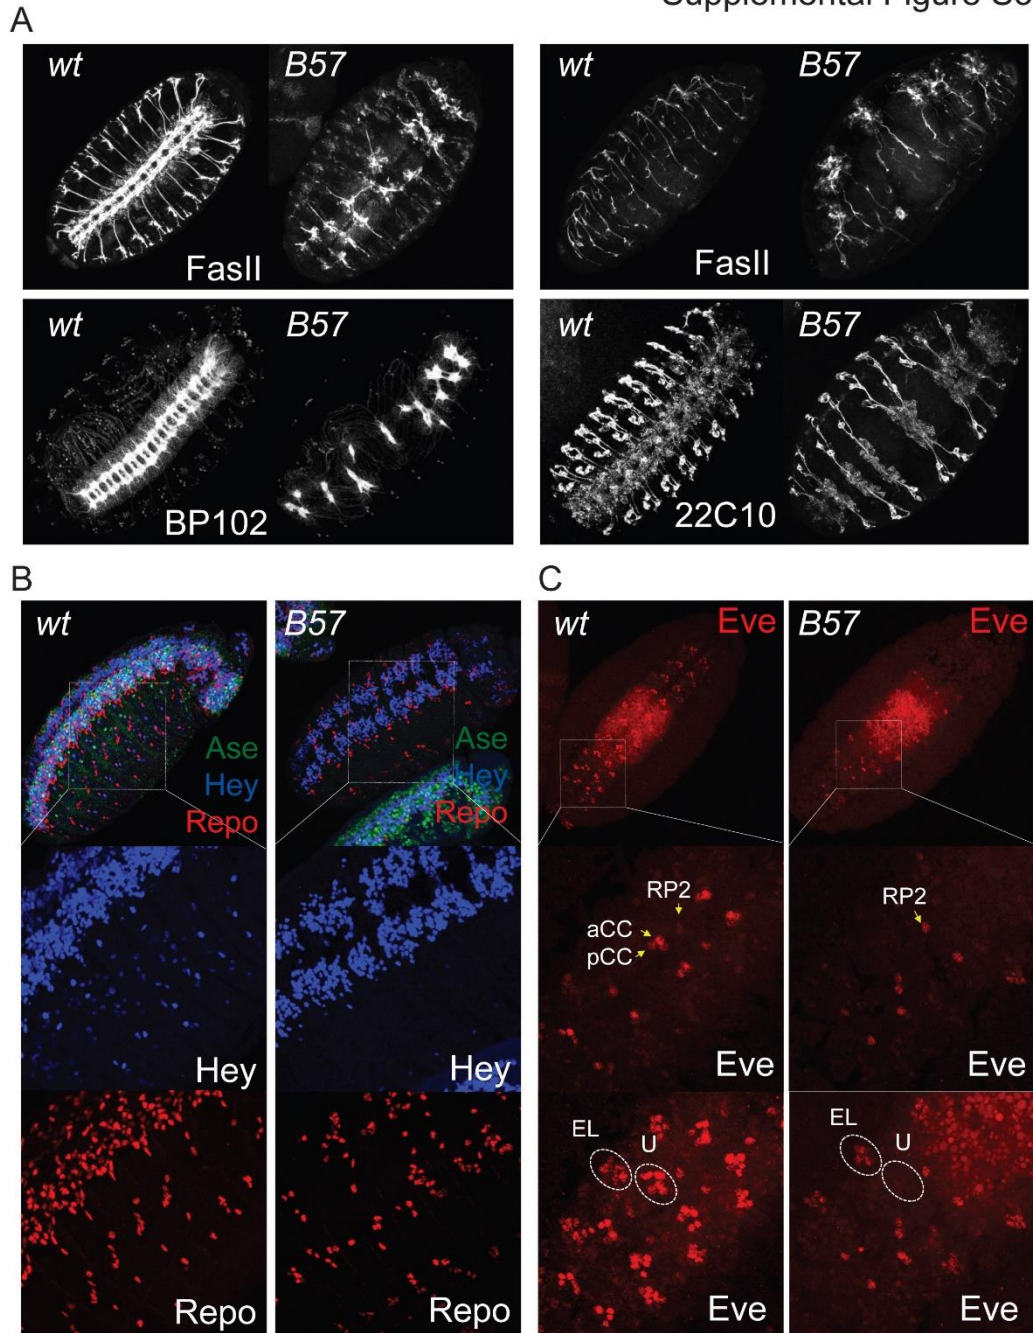

75

76 **Fig. S5. Depletions of the glia and neuronal populations in ASC mutants result in severe**  
 77 **axonal defects.** A) Stage 16 Dfsc(1)B57 embryos, stained with FasII, BP102 and  
 78 Futsch/22C10 display extensive neuronal hypoplasia. Note the complete lack of the  
 79 longitudinal VNC tracts (FasII and BP102 ventral views, left panels), the defects in  
 80 intersegmental and the segmental nerve development and pathfinding (FasII sagittal, top right  
 81 panels) and the tightly apposed bilateral neuronal populations in the VNC neuromeres  
 82 suggestive of incomplete midline function and production of repulsion cues (22C10 ventral  
 83 view, bottom right panels). B) Repo (glia) and Hey (neuron subset) staining reveal a severe  
 84 loss in differentiated cell populations. C) The Eve positive neurons are diminished in  
 85 Dfsc(1)B57 embryos. Middle panels are closeups of the dorsal VNC; bottom panels ventral  
 86 VNC of the same field.



Supplemental Figure S6

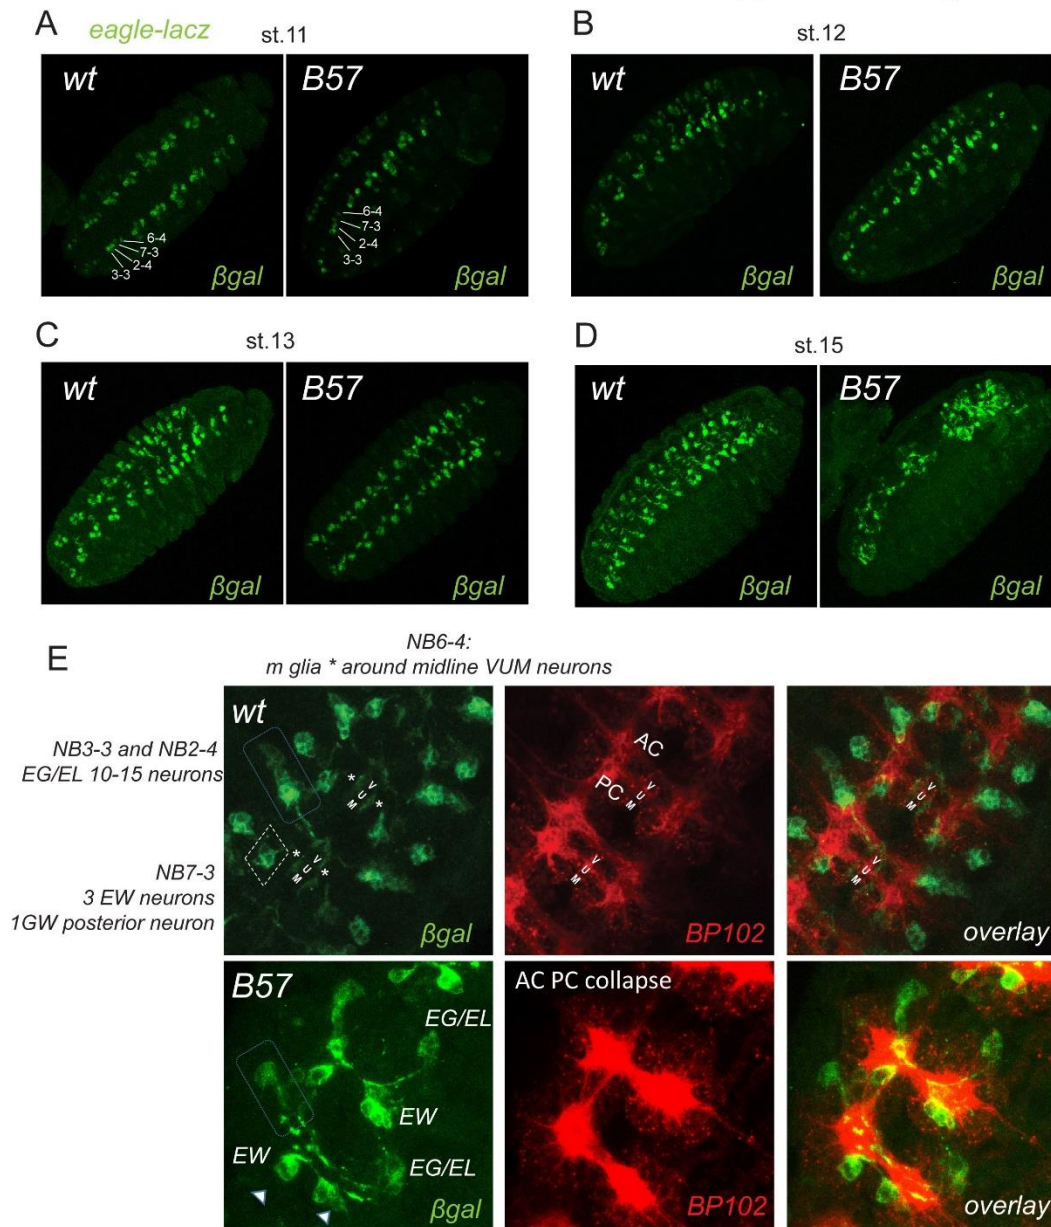

87

88 **Fig. S6. Proneurals contribute to late NB identity and progeny fidelity**

89 A) *eagle-lacZ* expression shows that at stage 11 all four positive neuroblasts have delaminated  
 90 in Df(1)scB57. B) Stage 12 embryos do not show major differences in *eagle-lacZ* positive cells.  
 91 C) By stage 13, the medial glia, progeny of 6-4, that move towards the midline are absent or  
 92 have lower expression in the Df(1)scB57. D) By stage 15 the nerve cord shows severe  
 93 disorganization in mutants. E) Stage 15 VNC close-ups show an Anterior-Posterior  
 94 Commissural axonal collapse, no medial glia (asterisks in wt), a diminished EG/EL neuronal  
 95 population (boxed), an EW neuron missing (left arrowhead) whereas the other EW (right  
 96 arrowhead) is sending its axon laterally instead of posteriorly.

97

98

99

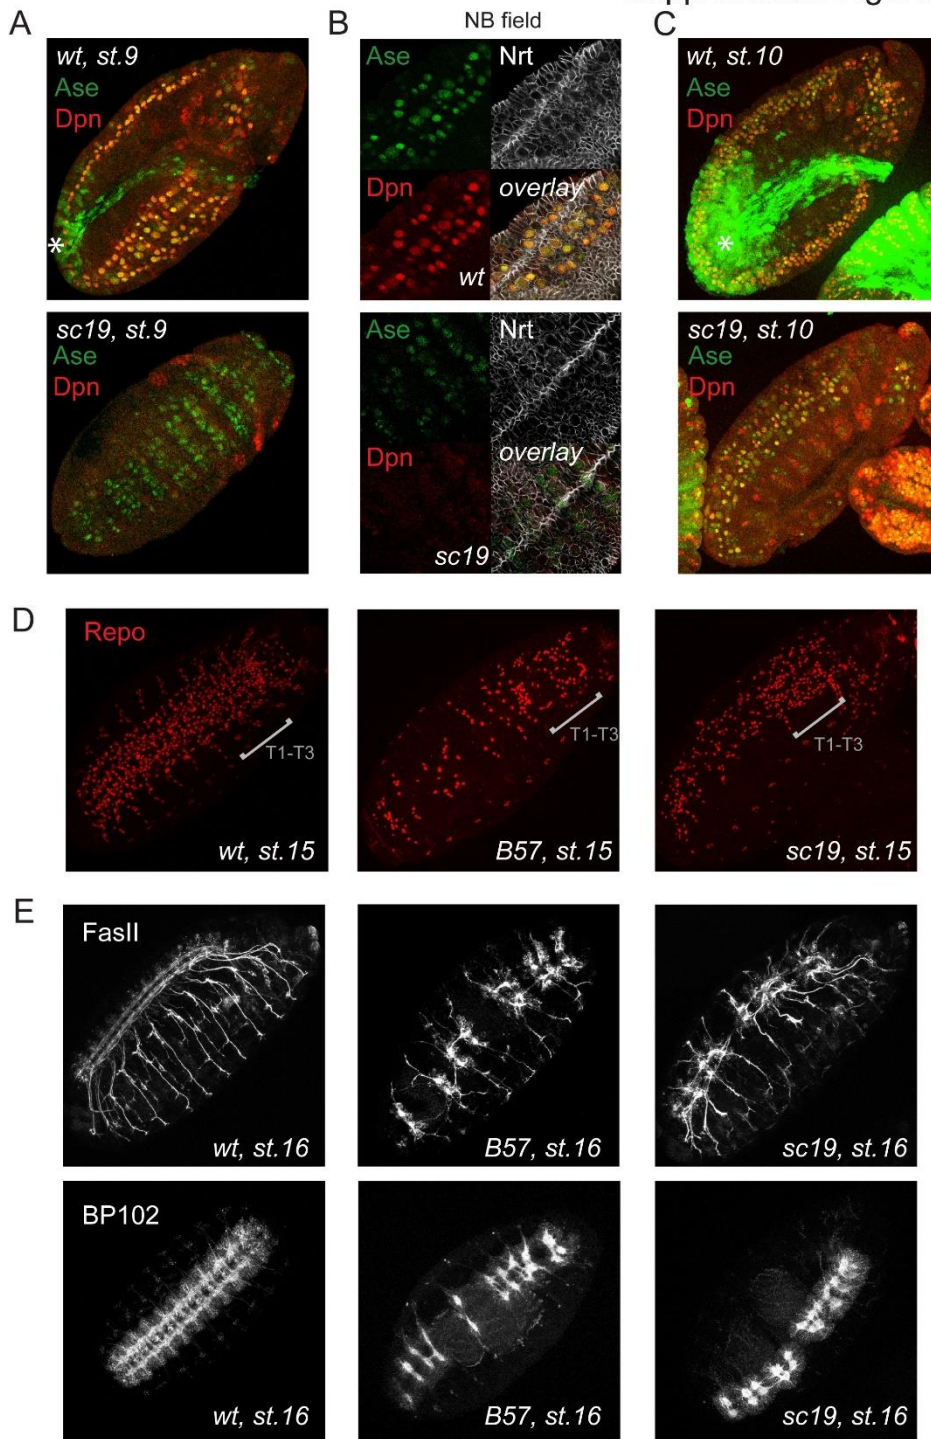

100

101 **Fig. S7. Asense provides partial neuroblast functionality and CNS development in the**  
 102 **absence of ac, sc and l(1)sc.** A) Stage 9 wt and Df(1)sc19 embryos. Wt neuroblasts express  
 103 Ase and Dpn robustly while mutant have weak transient expression of Ase at the NE layer. B)  
 104 Single sections at the neuroblast level show that in Df(1)sc19 embryos not all neuroblasts  
 105 (large round cells) express Ase and none express Dpn. Nrt marks cell outlines. C) During  
 106 stage 10 both wt and Df(1)sc19 embryos express both Dpn and Ase in neuroblasts. Note that  
 107 the wt embryo also shows KrGal4>GFP expression (used to distinguish wt from mutant  
 108 embryos) in the green channel, noted with a \*. C) Df(1)sc19 embryos have more glia than  
 109 Df(1)scB57 E) Axonal hypoplasia is less severe in Df(1)sc19 compare to Df(1)scB57.

Supplemental Figure S8

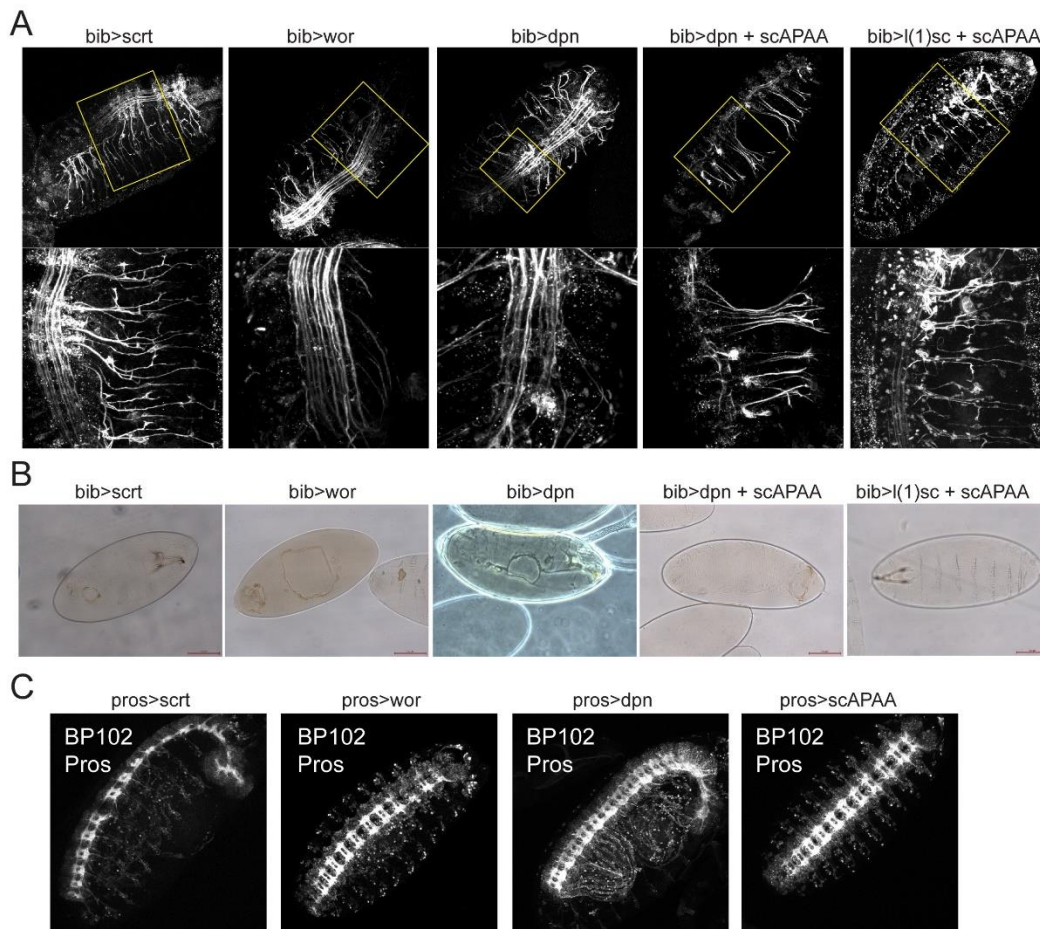

110

111 **Fig. S8. Neuroectodermal induction of proneural targets enhances neurogenesis at the**  
 112 **expense of epidermal fate.** A) Neuroectodermal overexpression using bibGal4 of UAS-scrt,  
 113 UAS-wor, UAS-dpn, UAS-dpn + UAS-scAPAA and UAS-l(1)sc + UAS-scAPAA result in  
 114 highly hyperplastic late CNS phenotypes. A) Cuticle preparation from bibGal4 UAS-scrt, UAS-  
 115 wor, UAS-dpn and UAS-dpn + UAS-scAPAA show ventral/ cephalic holes indicative of  
 116 defects in the epidermis. C) Induction of UAS targets in the neuroblasts using pros-Gal4 does  
 117 not affect late CNS development.
